# Supplementary material for: iMKT: the integrative McDonald and Kreitman test
Source: PubMed Central journal article supplement (PMC6602517; doi:10.1093/nar/gkz372), 2019-05-13
Supplement: gkz372_supplemental_file.pdf [file gkz372_supplemental_file.pdf]

# Supplementary material

## iMKT: the integrative McDonald and Kreitman test

Jesús Murga-Moreno, Marta Coronado-Zamora, Sergi Hervás, Sònia Casillas and Antonio Barbadilla\*

Institut de Biotecnologia i de Biomedicina and Departament de Genètica i de Microbiologia, Universitat Autònoma de Barcelona, 08193 Bellaterra, Barcelona, Spain.

\*To whom correspondence should be addressed. Tel: +34 93 5868941; Fax: +34 93 5812011; Email: [antonio.barbadilla@uab.cat](mailto:antonio.barbadilla@uab.cat)

**Supplementary Table 1.** Number of lines resampled in each *Drosophila* population available at iMKT.

| Population | Number of resampled lines |
|------------|---------------------------|
| RAL        | 160                       |
| USI        | 15                        |
| USW        | 27                        |
| CO         | 9                         |
| EA         | 10                        |
| EF         | 25                        |
| EG         | 10                        |
| GA         | 7                         |
| RG         | 21                        |
| SP         | 20                        |
| SD         | 30                        |
| ZI         | 154                       |
| CHB        | 12                        |
| FR         | 70                        |
| NTH        | 15                        |
| AUS        | 14                        |
